# Supplementary material
Source: publisher figshare collection journal article supplement (https://sage.figshare.com/ndownloader/files/17090126)
Supplement: Supplementary file 1 [file 17090126]

## Supplemental material

### Appendix 1. Example of search strategy

| Databases | Search strategies                                                                                                                                                                                                                                                                                                                                                                                                                                                                                                                                                                                                                                                                                                                                                                                                                                                                                                                                                                                                                                                                                                                                                                                                                                   |
|-----------|-----------------------------------------------------------------------------------------------------------------------------------------------------------------------------------------------------------------------------------------------------------------------------------------------------------------------------------------------------------------------------------------------------------------------------------------------------------------------------------------------------------------------------------------------------------------------------------------------------------------------------------------------------------------------------------------------------------------------------------------------------------------------------------------------------------------------------------------------------------------------------------------------------------------------------------------------------------------------------------------------------------------------------------------------------------------------------------------------------------------------------------------------------------------------------------------------------------------------------------------------------|
| Embase    | reliability:ab,ti OR 'validity responsiveness':ab,ti OR 'minimal detectable change':ab,ti OR 'minimum detectable change':ab,ti OR 'minimal clinical important difference':ab,ti OR 'minimum clinical important difference':ab,ti OR 'minimal clinically important difference':ab,ti OR 'minimum clinically important difference':ab,ti OR 'factor analysis':ab,ti OR translation:ab,ti OR validation:ab,ti OR 'floor effect':ab,ti OR 'ceiling effect':ab,ti OR 'internal consistency':ab,ti OR 'item response':ab,ti OR 'rasch':ab,ti OR applicability:ab,ti OR feasibility:ab,ti OR psychometry:ab,ti AND (('community integration':ab,ti AND assessment:ab,ti) OR CIQ:ab,ti OR 'community integration questionnaire':ab,ti))                                                                                                                                                                                                                                                                                                                                                                                                                                                                                                                     |
| CINAHL    | (TI "community integration questionnaire" OR AB "community integration questionnaire") OR (TI ( "community integration" AND assessment ) OR AB ( "community integration" AND assessment )) OR (TI CIQ OR AB CIQ) AND TI ( "reliability" OR "validity" OR "responsiveness" OR "minimal detectable change" OR "minimum detectable change" OR "minimal clinical important difference" OR "minimum clinical important difference" OR "minimal clinically important difference" OR "minimum clinically important difference" OR "factor analysis" OR "translation" OR "validation" OR "floor effect" OR "ceiling effect" OR "internal consistency" OR "item response" OR "Rasch" OR "applicability" OR "feasibility" OR "psychometry" ) OR AB ( "reliability" OR "validity" OR "responsiveness" OR "minimal detectable change" OR "minimum detectable change" OR "minimal clinical important difference" OR "minimum clinical important difference" OR "minimal clinically important difference" OR "minimum clinically important difference" OR "factor analysis" OR "translation" OR "validation" OR "floor effect" OR "ceiling effect" OR "internal consistency" OR "item response" OR "Rasch" OR "applicability" OR "feasibility" OR "psychometry" ) |
